# Supplementary figures and images for: Specific features of the electronic and crystal structure of CuxZrSe2 (0 < x ≤ 0.3)
Source: Royal Society of Chemistry journal article supplement (doi:10.1039/d0tc01884h), 2020-01-01

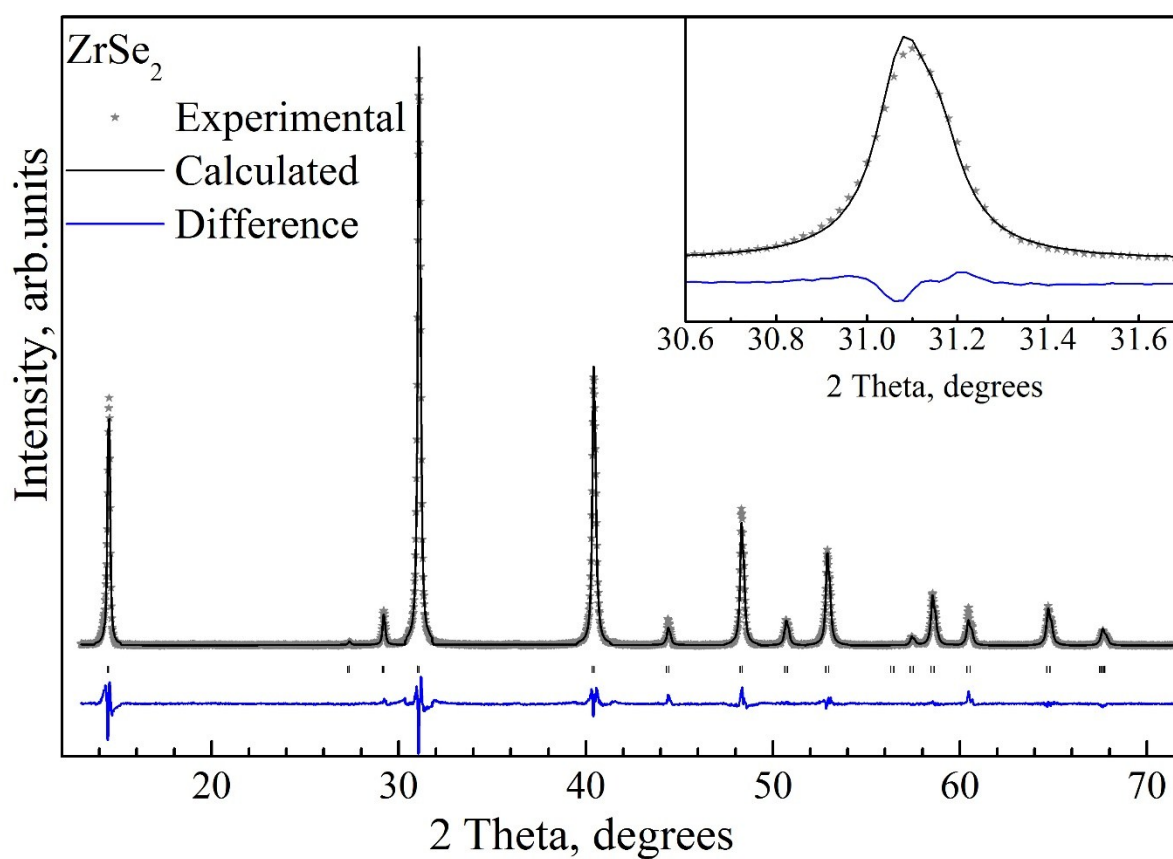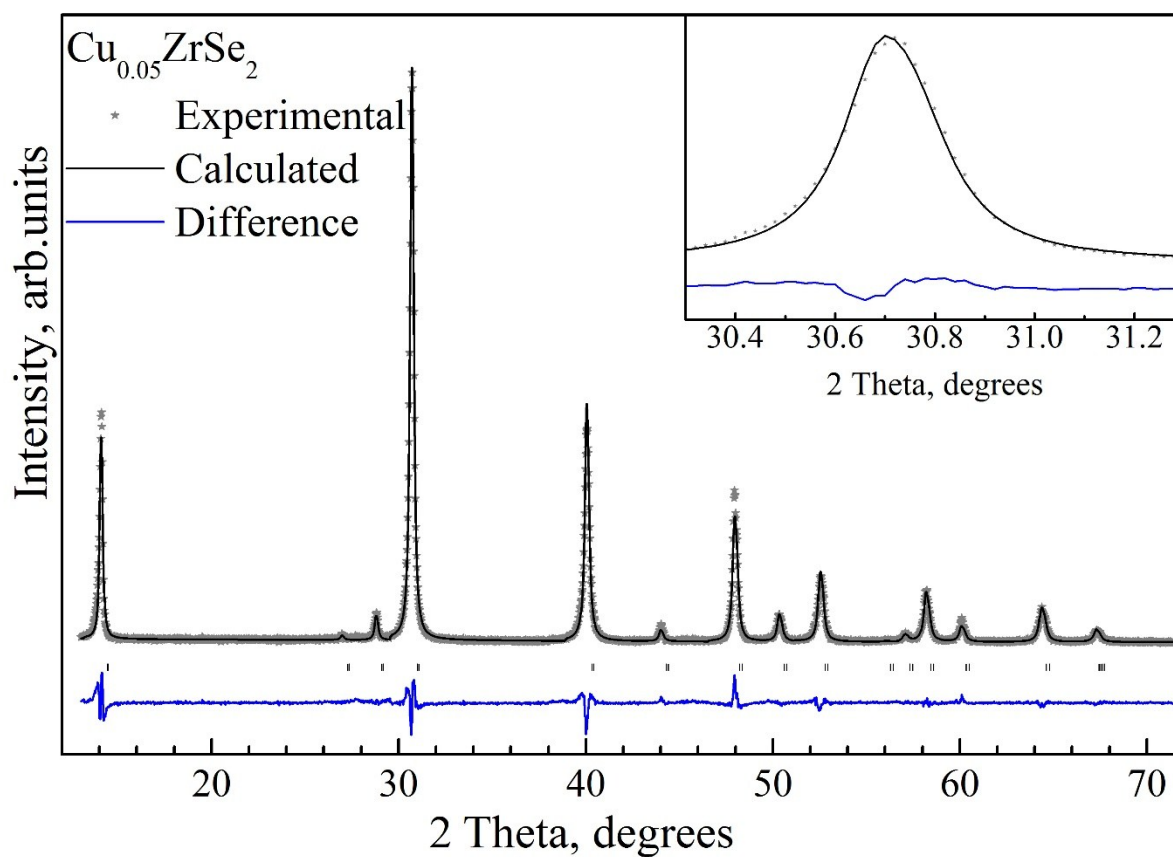

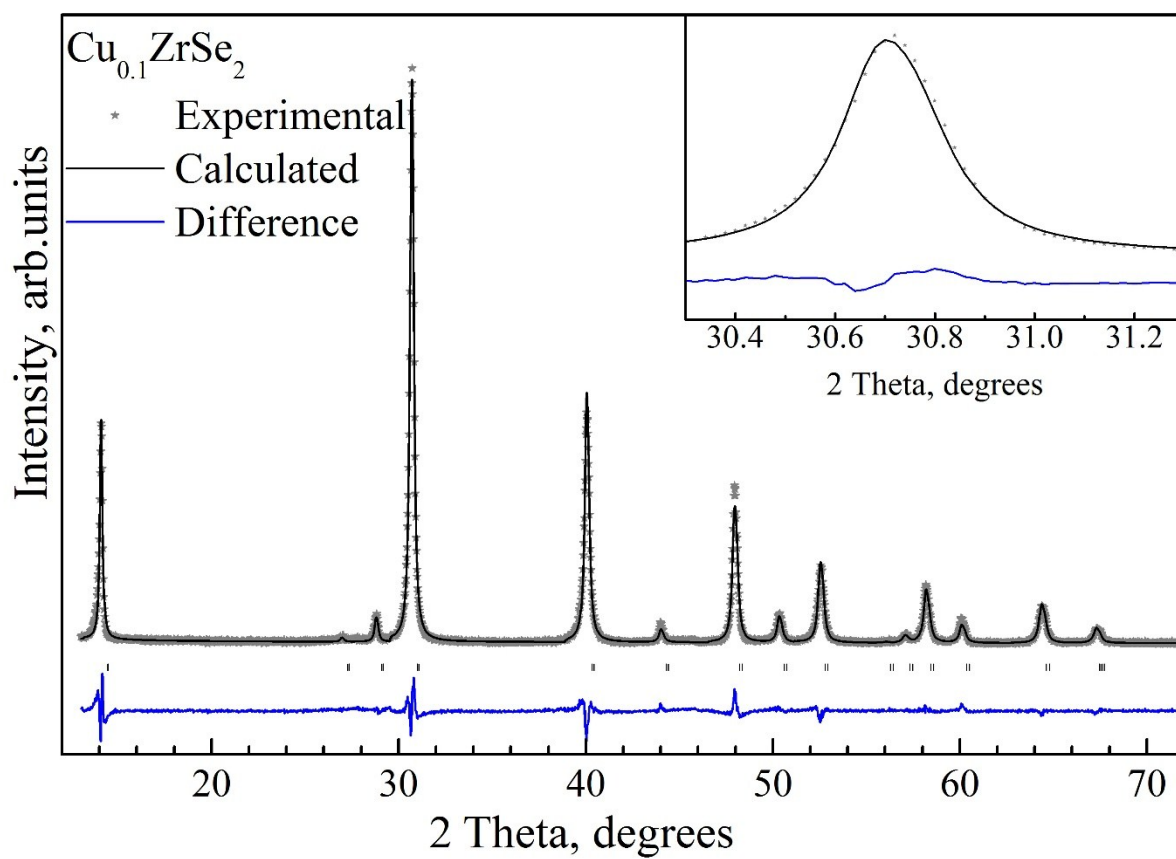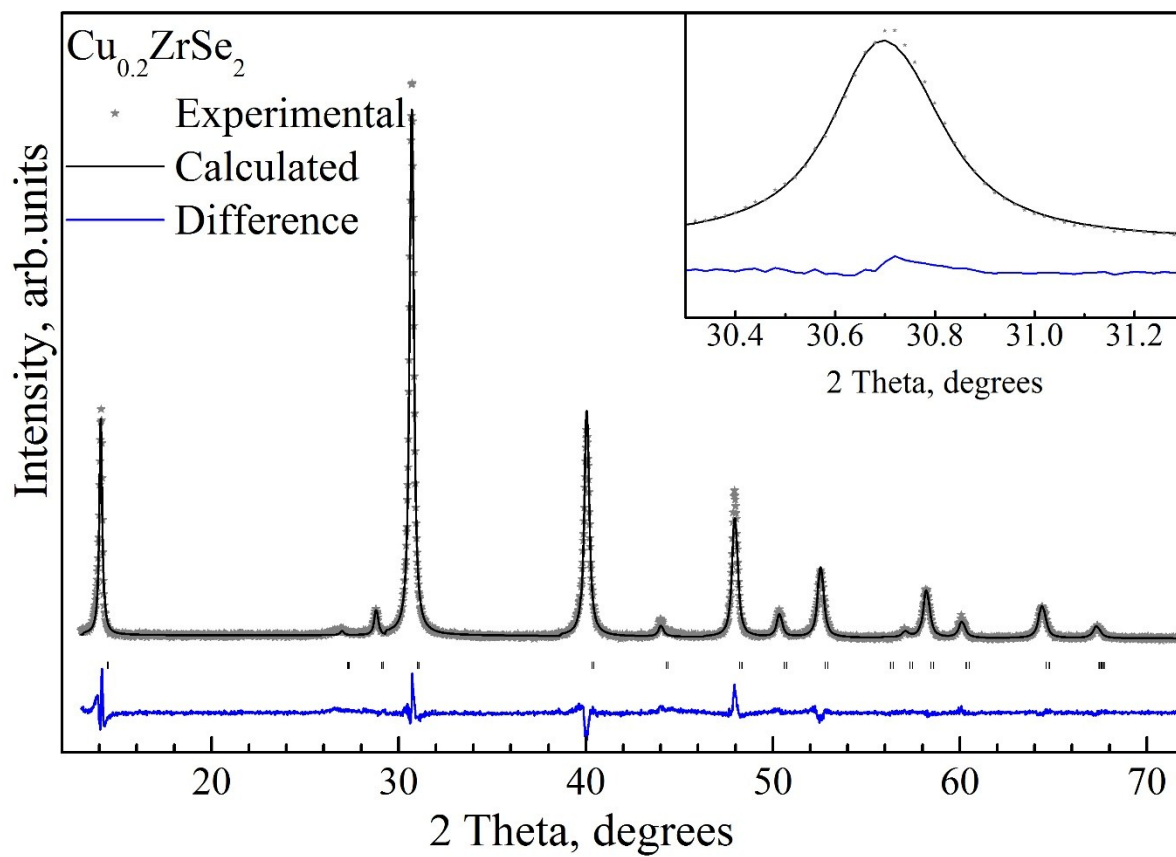

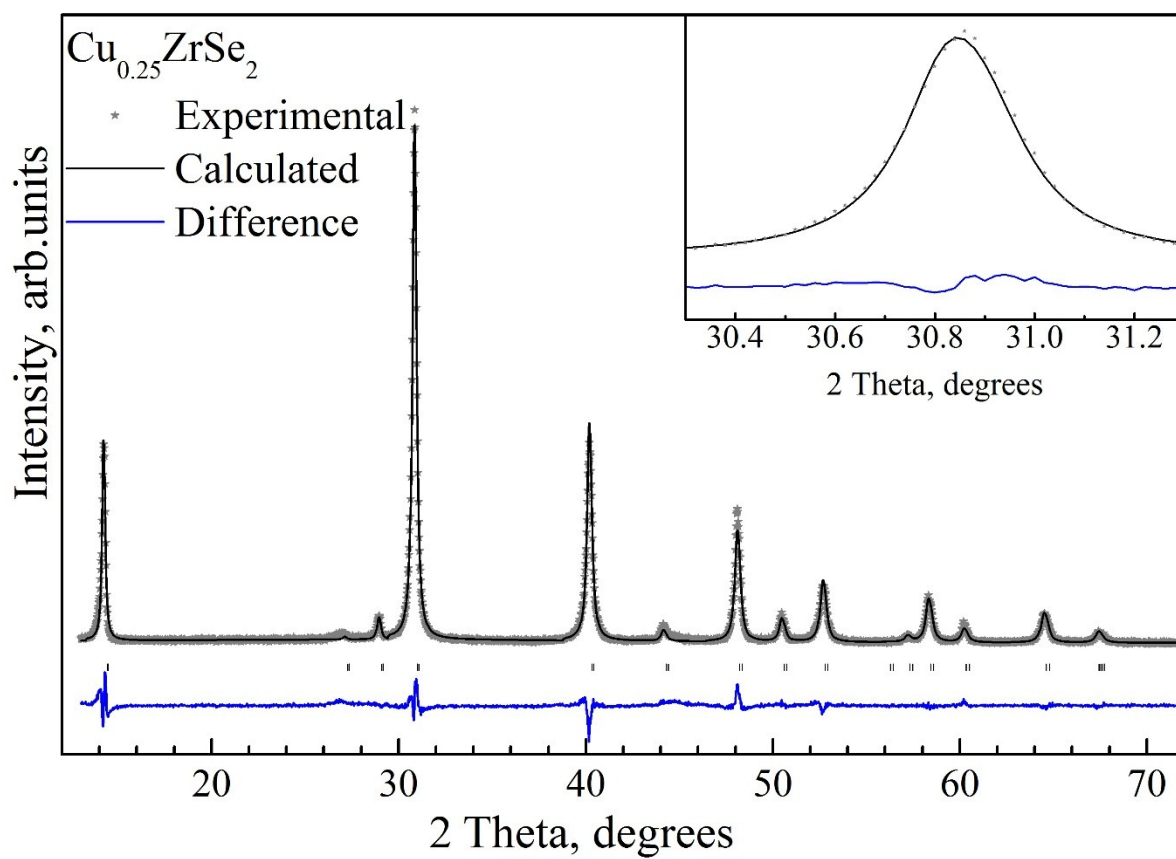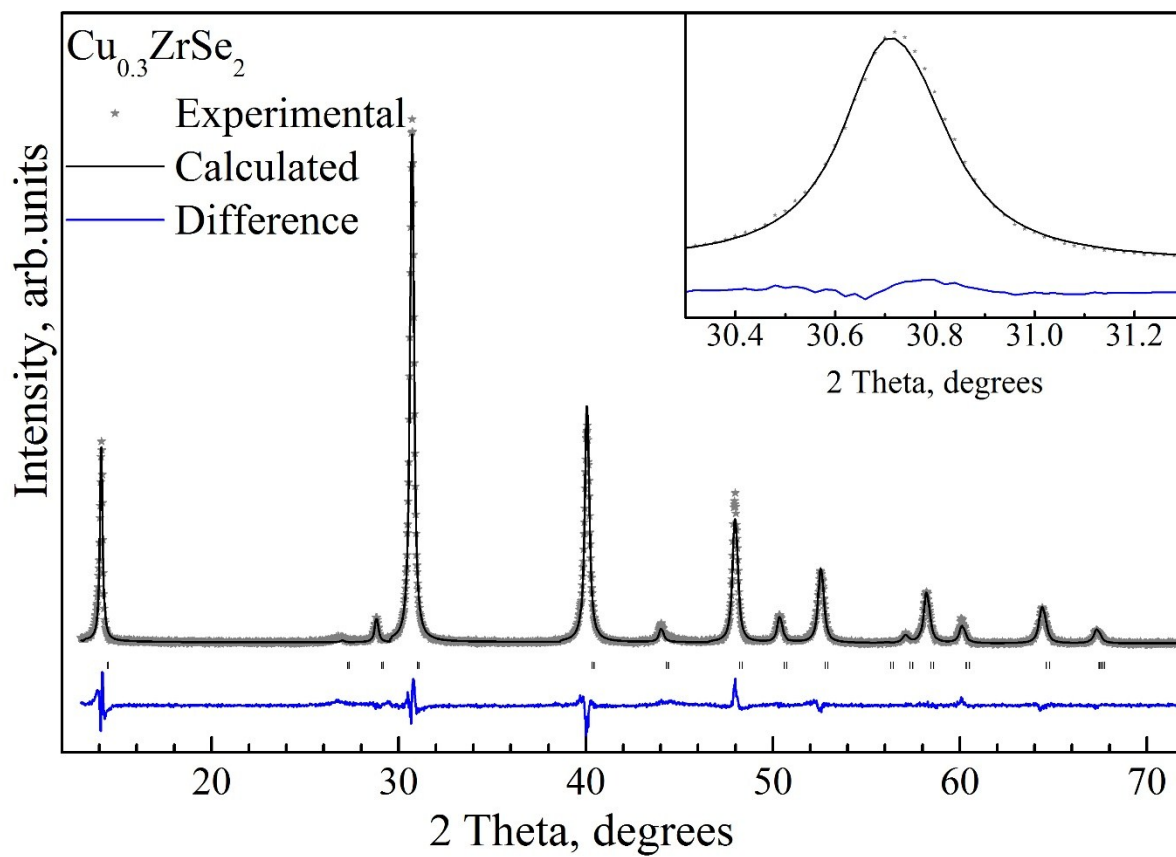

Supplement: d0tc01884h1.pdf [file d0tc01884h1.pdf]
